# Supplementary material for: PGI2 Analog Attenuates Salt-Induced Renal Injury through the Inhibition of Inflammation and Rac1-MR Activation
Source: Int J Mol Sci. 2020 Jun 22;21(12):4433. doi: 10.3390/ijms21124433 (PMC7353033; doi:10.3390/ijms21124433)
Supplement: Supplementary file 1 [file ijms-21-04433-s001.pdf]

## Supplementary Materials

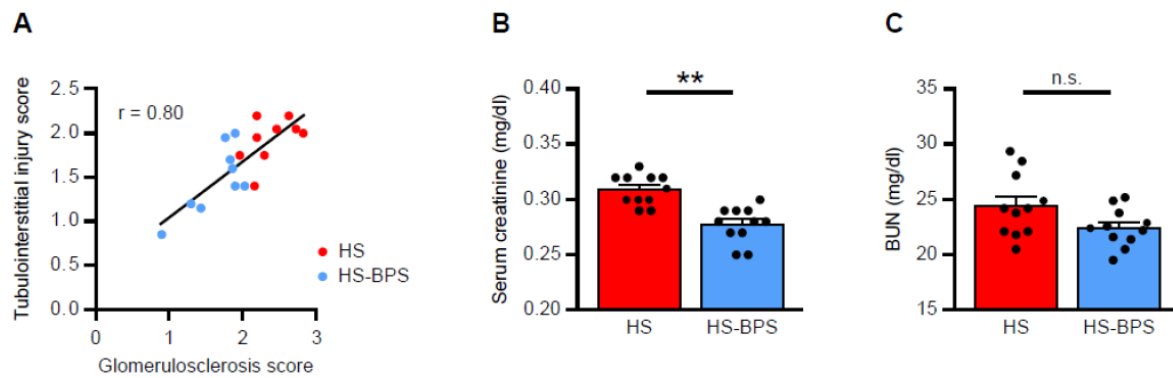

**Figure S1.** Relationship between glomerulosclerosis and tubulointerstitial scores, serum creatinine and BUN levels in high-salt-fed DS rats with or without BPS treatment. (A) Relationship between glomerulosclerosis and tubulointerstitial scores in HS and HS-BPS rats ( $n = 9$  per group). (B) Serum creatinine and (C) BUN levels in HS and HS-BPS rats ( $n = 11$  per group). Data are expressed as mean  $\pm$  SEM. \*\*  $p < 0.01$ ; n.s., not significant.

**Table S1.** List of primer pairs used in this study.

| mRNA                          | Accession Number |         | Primer Pair (5'-3')   |
|-------------------------------|------------------|---------|-----------------------|
| <i>IL-1<math>\beta</math></i> | NM_031512.2      | Forward | AAAAATGCCTCGTGCTGTCT  |
|                               |                  | Reverse | CAGGGATTTTGTCTGTTGCTT |
| <i>IL-6</i>                   | NM_012589.2      | Forward | AGAGACTTCCAGCCAGTTGC  |
|                               |                  | Reverse | TGAAGTAGGGAAGGCAGTGG  |
| <i>CD68</i>                   | NM_001031638.1   | Forward | CAAAAAGGCTGCCACTCTTC  |
|                               |                  | Reverse | CTCCGGTGGTTGTAGGTGT   |
